# Supplementary material
Source: PubMed Central journal article supplement (PMC7536133)
Supplement: NIHMS1629586-supplement-Supplementary.pdf [file NIHMS1629586-supplement-Supplementary.pdf]

**A** cardiomyocytes only

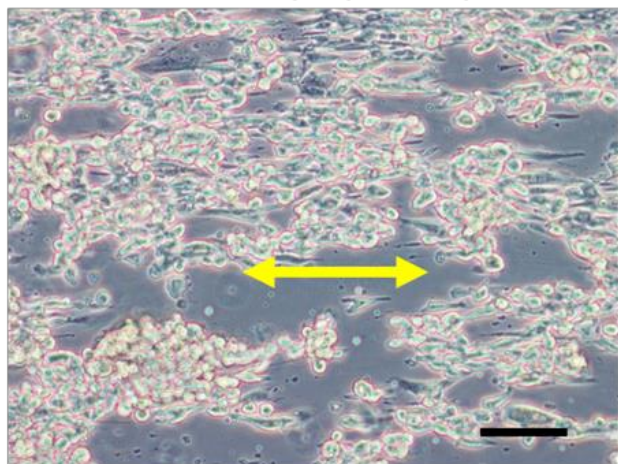

**B** cardiomyocytes + endothelial cells

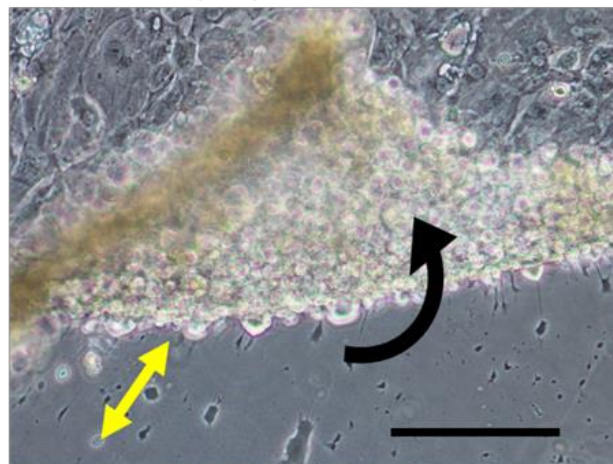

**Supplemental Figure 1.** Representative brightfield microscope images of detaching nanopatterned cardiac sheets without incorporation of stromal cells **(A)** and with incorporation of endothelial cells **(B)** demonstrating intact, spontaneous cardiac sheet detachment only in the co-culture condition. Direction of cell sheet detachment is labeled by the black arrow. Double headed yellow arrows in **(A)** and **(B)** denote the orientation of the nanotopography on the scaffold below. Scale bars, 100 $\mu$ m.

### UC 3-4 iPSC-derived Cardiomyocyte Purity

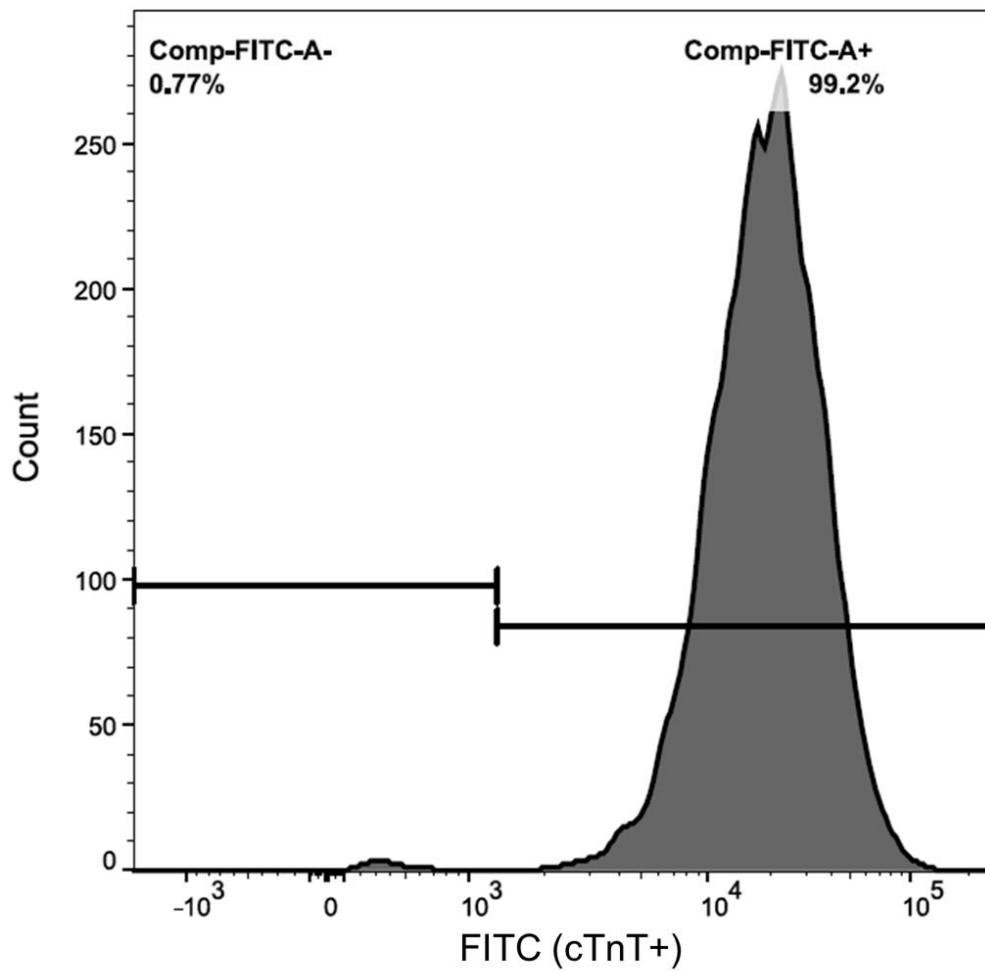

**Supplemental Figure 2.** Flow cytometry of purified iPSC-derived cardiomyocytes stained for cardiac troponin T (cTnT). Cells were subjected to lactate selection medium for 3 days and then harvested on day 17 for flow cytometry. 99.2% of cells were identified as positive for cTnT.

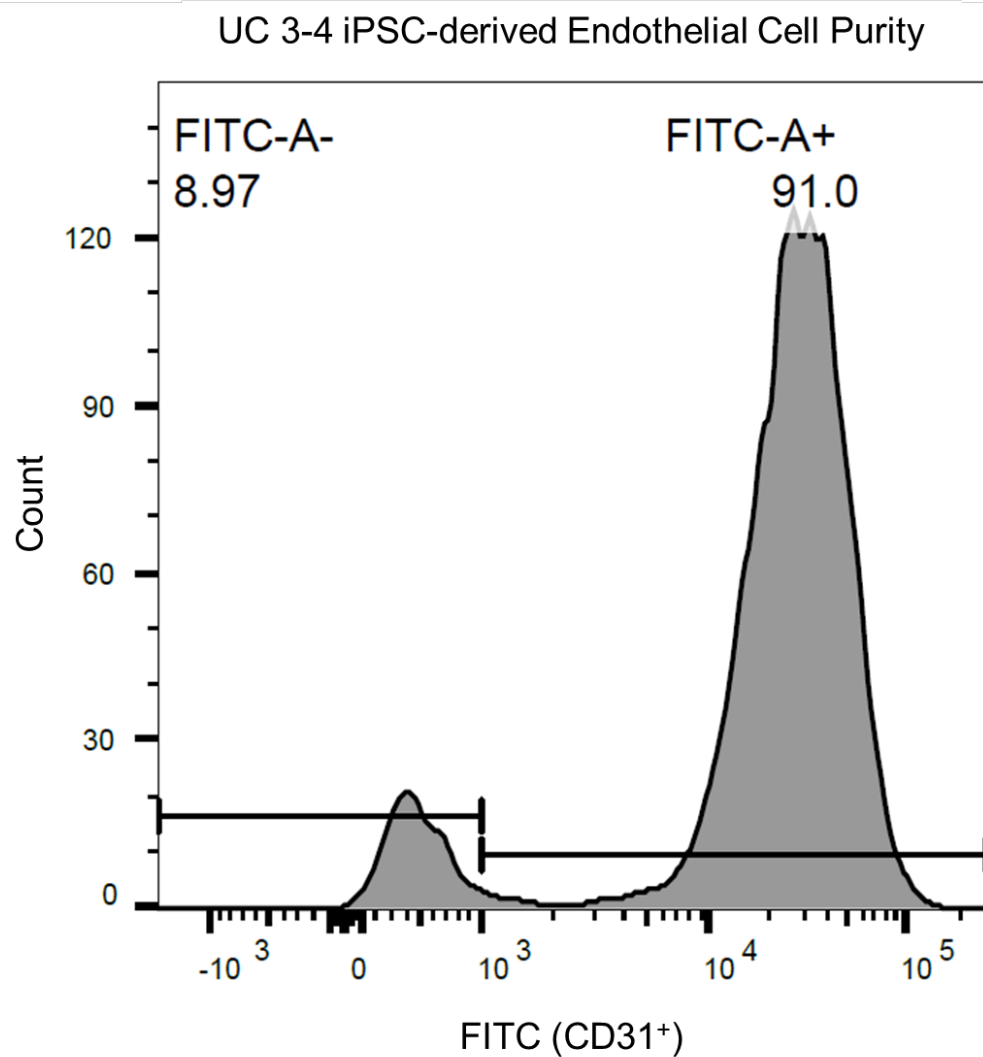

**Supplemental Figure 3.** Flow cytometry of iPSC-derived endocardial-like endothelial cells live-stained for CD31 surface markers on day 12. 91.0% of cells were identified as positive for CD31 surface markers.

**Supplemental Video 1. Skeletal muscle tubes contract after culture with electrical stimulation.** Skeletal muscle bilayer tube after 14 days in culture with 11 days of chronic electrical stimulation (1 Hz, 24 ms, 3 V pulses). Tubes were cultured in low serum containing medium for 3 days before beginning electrical stimulation to promote fusion myoblasts into myotubes.

**Supplemental Video 2. Cardiac muscle tubes contract under electrical stimulation.** Cross-sectional view of cardiac tube after 37 days in culture with chronic pacing using broad-field electrical stimulation (1 Hz, 3 V, 8 ms pulses).
